1           **Probing complexity of microalgae mixtures with**  
2           **novel spectral flow cytometry approach and “virtual**  
3           **filtering”**

4  
5           ***Short title: Spectral flow cytometry and “virtual” filtering***  
6           ***analysis of microalgae***

7           Natasha S. Barteneva<sup>#,1,2</sup>, Veronika Dashkova<sup>1</sup>, Ivan Vorobjev<sup>1,3</sup>

8           <sup>1</sup>School of Science and Technology, and <sup>2</sup>The EREC (Environment and Resource Efficiency  
9           Cluster), Nazarbayev University, Astana, Kazakhstan

10          <sup>3</sup>National Laboratory Astana, Nazarbayev University, Astana, Kazakhstan

11  
12          <sup>#</sup>Corresponding author: Natasha S. Barteneva,

13          Present address:           53 Kabanbay Batyr Avenue, 7ext522

14                                       Astana, 01000, Kazakhstan

15                                       e-mail: natalie.barteneva@nu.edu.kz

16                                       phone: +7(778)6357336

17  
18  
19  
20  
21  
22  
23  
24  
25  
26          Abstract: 170

27 MS words: 2712

28

## 29 **Abstract**

30 Fluorescence methods are widely applied for the study of the marine and freshwater  
31 phytoplankton communities. However, identification of different microalgae populations by  
32 autofluorescent pigments remains a challenge because of the very strong signal from chlorophyll.  
33 Addressing the issue we developed a novel approach using the flexibility of spectral flow  
34 cytometry analysis (SFC) and generated a matrix of virtual filters (VF) capable to of  
35 differentiating non-chlorophyll parts of the spectrum. Using this matrix spectral emission regions  
36 of algae species were analyzed, and five major algal taxa were discriminated. These results were  
37 further applied for tracing particular microalgae taxa in the complex mixtures of laboratory and  
38 environmental algal populations. An integrated analysis of single algal events combined with  
39 unique spectral emission fingerprints and light scattering parameters of microalgae can be further  
40 used to differentiate major microalgal taxa. Our results demonstrate that spectral flow cytometer  
41 (SFC-VF) and virtual filtering approach can provide a quantitative assessing of heterogenous  
42 phytoplankton communities at single cell level spectra and be helpful in the monitoring of  
43 phytoplankton blooms.

44

45 **Key Words:** spectral flow cytometry; autofluorescence; microalgae; virtual filtering;  
46 phytoplankton; chlorophyll

47

48

49

50

51

- 52 • The research was partly presented during AQUAFLUO II Colloquium 2017, Sydney,  
53 Australia and ISAC Congress, Boston 2017

54

55

## 56 **Introduction**

57 Phytoplankton organisms form the base of aquatic food webs and have a wide range of  
58 photosynthetic and photoprotective pigments, which are of great interest as markers to identify  
59 species in freshwater and seawater environmental samples representing different phytoplankton  
60 communities [1]. Currently, several methods are used to determine phytoplankton community  
61 structure, including microscopy, flow cytometry, spectrofluorometry, fluorescent spectroscopy,  
62 and pigments analysis by high-performance liquid chromatography (HPLC) [2]. The microscopy  
63 approach is laborious, time-consuming, and reproducibility among different research groups can  
64 be low [3]. The measurement of fluorescence spectra was extensively developed for  
65 characterizing phytoplankton taxa starting the 1970s [1, 4-9]. During the past decade, multi-  
66 channel fluorometers and scanning spectrofluorometers were applied to evaluate phytoplankton  
67 composition by measuring excitation spectra of chlorophyll *a* (**Chl a**) and accessory pigments  
68 fluorescence at multiple wavelengths and creating excitation-emission matrices [10-13]. *In vivo*  
69 fluorescence methods are widely used for characterization of the phytoplankton communities,  
70 but numerous attempts to achieve a taxonomic identification of the algae taxa there remains  
71 problematic [6,9]. Measurements of fluorescence of phytoplankton communities are affected by  
72 variable biomass concentrations and therefore a varying contribution in autofluorescence signal  
73 of different microalgae subpopulations as well as inter- and intra-species pigment composition  
74 variability [14]. Till now a spectral analysis of phytoplankton communities based on spectra of  
75 averaged algal samples and can overlook a contribution of a small algal population such as  
76 cryptophytes presented in environmental samples, and also fluorescent signal might have  
77 admixture from other sources such as colored chromophoric water-dissolved organic matter and  
78 detrital pigment [15-16]. So far, any spectral approach based on averaged spectral data does not  
79 allow an actual separation of microalgae taxa contributing < 20% of the biomass in  
80 heterogeneous algal population.

81 The critical advantage of spectral flow cytometry (SFC) is that a measurement of complete  
82 spectrum happens from single cells with rates of hundreds and thousands of events per sec [17-  
83 19]. Moreover, SFC analysis makes possible additional differentiation of heterogeneous algal

84 mixtures by size and granularity in the manner similar to conventional flow cytometry (FCM)  
85 [17, 20]. The emission spectrum information for every single cell can be combined with light  
86 scattering data through sequential gating on combinations of standard dot plots and histograms.

87 Using SFC advantages we developed a novel “virtual filtering” approach (SFC-VF) based on  
88 analysis of variable spectral emission regions in combination with light scattering-related  
89 separation of algal populations based on algae cellular size and granularity. We applied SFC-VF  
90 to differentiate and characterize different microalgae taxa in binary and multi-component  
91 mixtures as well as natural environmental microalgae assemblages and were able: (1) to  
92 distinguish of microalgal cells from phytoplankton taxa with a similar combination of pigments;  
93 and (2) to remove fluorescence signal from contaminating sources using light scatter-based  
94 gating. Moreover, differently, from FCM it makes possible separation of individual algal cells  
95 presented in heterogenous algal populations (such as cryptophytes) based on their unique spectral  
96 data.

## 97 **Methods**

### 98 **Microalgae cell cultures**

99 Microalgae cell cultures from major microalgae taxa including *Cyclotella meneghiniana*  
100 CCMP334 (diatoms), *Chlorella sp.* CCMP251 (chlorophytes), *Dinobryon divergens* CCMP3055  
101 (chrysophytes), *Cryptomonas pyrenoidifera* CCMP1177 (cryptophytes) and *Aphanizomenon sp.*  
102 CCMP2764 (cyanobacteria) were obtained from the National Center for Marine Algae and  
103 Microbiota (Bigelow Laboratory for Ocean Sciences). Freshwater cultures *D. divergens*,  
104 *Aphanizomenon sp.* and *C. pyrenoidifera* were maintained in DY-V medium (modified from [20])  
105 at 14°C, 14°C and 20°C, respectively, under 150  $\mu\text{moles}/\text{m}^2/\text{sec}$  light and 12/12 L/D cycle.  
106 *Chlorella sp.* and *C. meneghiniana* were maintained in L1 medium and L1 derivative, L1-11 psi  
107 medium, respectively, at 14°C under 150  $\mu\text{moles}/\text{m}^2/\text{sec}$  light and 12/12 L/D cycle. For spectral  
108 analysis, 1000  $\mu\text{l}$  volume of each culture was used to analyze single culture controls, 500  $\mu\text{l}$   
109 volume of each culture was used to analyze ten pairwise culture mixtures, and 200  $\mu\text{l}$  volume of  
110 each culture to analyze a mixture of all five cultures together (ratio 1:1). Cell concentration of  
111 microalgae cultures was in the 20,000-75,000 cell  $\text{mL}^{-1}$  range.

### 112 **Environmental microalgae samples**

113 For experiments on tracing spectral profile of cyanobacteria *Aphanizomenon sp.* CCMP2764 in  
114 environmental algal populations, samples were collected from 8 freshwater and coastal ponds in  
115 Massachusetts and Maine states, USA. Freshly collected and non-concentrated environmental  
116 samples were mixed with *Aphanizomenon sp.* culture in the following volume ratios: 100% of  
117 2764 culture and 0% of pond sample, 50% of 2764 culture and 50% of pond sample, 10% of  
118 2764 culture and 90% of pond sample, 5% of 2764 culture and 95% of pond sample, 1% of 2764  
119 culture and 99% of pond sample, 0.5% of 2764 culture and 95.5% of pond sample, and 100% of  
120 pond sample. Cell concentration of collected environmental samples was in the 7,000-55,000 cell  
121 mL<sup>-1</sup> range.

## 122 **Light microscopy**

123 Images of microalgae culture cells were acquired using a confocal laser scanning microscope  
124 780 (Zeiss, USA) and analyzed using ZEN software (Zeiss, USA) (**Fig.1A**).

125 **Figure 1 Caption.** **A.** Light microscopy and spectrofluorometric data of algal cell cultures. **i** -  
126 *Aphanizomenon sp.*, **ii** - *C. pyrenoidifera*, **iii** - *D. divergens*, **iv** - *C. menghiniana*, **v** - *Chlorella*  
127 *sp.* First column – light microscopy images of algal cultures acquired using a confocal laser  
128 scanning microscope 780 (Carl Zeiss) in TL brightfield (objective x100); second column –  
129 spectrofluorometric data of the corresponding culture obtained with 407 nm and 488 nm  
130 excitation.**B.** Spectral FCM data of algal cell cultures. *Aphanizomenon sp.*, *C. pyrenoidifera*, *D.*  
131 *divergens*, *C. menghiniana*, *Chlorella sp.* First column – spectral data in 500-800 nm wavelength  
132 range of corresponding cultures obtained using spectral analyzer SP6800 with 488 nm laser  
133 excitation; second column – spectral data in 420-800 nm wavelength range of corresponding  
134 culture obtained using spectral analyzer SP6800 with 405 nm laser excitation; third column -  
135 spectral data in 500-800 nm wavelength range of corresponding cultures obtained using spectral  
136 analyzer SP6800 with 488 nm laser excitation and reduced intensity of channels 24-30; fourth  
137 column - spectral data in 420-800 nm wavelength range of the corresponding culture obtained  
138 using spectral analyzer SP6800 with 405 nm laser excitation and reduced intensity of channels  
139 24-30. **C.** Virtual filtering analysis algorithm for a mixture of microalgae cells.

140

## 141 **Spectral flow cytometry analysis**

142 The spectral flow cytometer (spectral FCM) analyzer SP6800 (Sony Biotechnology Inc, USA)  
143 equipped with 488 nm, 405 nm and 638 nm lasers; 10 consecutive transparent optical prisms;  
144 and a 32-channel linear array photomultiplier (500-800 nm range for 488 nm excitation and 420-  
145 800 nm range for 405/638 lasers combination) was used for analysis of algal monocultures and  
146 environmental samples (**Fig.1B**). The instrument alignment was automatically performed using  
147 Ultra Rainbow calibration beads (Spherotech, USA) as described by Futamura et al. [22]. At  
148 least 50,000 events were collected for each sample. Environmental samples were recorded using  
149 all three available excitation sources, 488, 405 and 638 nm lasers. Single and mixed algal culture  
150 samples were recorded using blue 488 nm and violet 405 nm lasers. In order to increase non-  
151 chlorophyll based spectral differences between the algal populations, gain of PMT channels 24-  
152 30 was adjusted to 2, whereas the rest of the PMT channels were set to the maximum gain of 8.  
153 FSC gain and SSC gain were set to 17 with the threshold FSC value of 1.7% and fluorescence  
154 using Sony software v1.6 (Sony Biotechnology Inc., USA) and FlowJo software v10.2 (Treestar,  
155 USA).

156 **Spectral analysis of algal mixtures.** Spectral data of all cells in the mixture were visualized in  
157 488 nm laser excitation and 405 nm laser excitation spectrum charts (**Fig.1C**). Based on the most  
158 variable spectral regions, combination of virtual filters corresponding to spectrum regions in  
159 channels 15-20 (488 nm excitation) and channel 32 (488 nm excitation) (**Fig. 2C, left**), channels  
160 31-32 (488 nm excitation) and channels V1-CH9 (405 nm excitation) (**Fig. 2C, middle**), and in  
161 channel 32 (488 nm excitation) and channels 4-15 (405 nm excitation) (**Fig. 2C, right**) were  
162 selected to achieve the best discrimination of the two cell populations.

163 **Figure 2 Caption. A, B, C** Spectral analysis of double algal culture mixtures: (A.) *D. divergens*  
164 and *C. pyrenoidifera* spp.; (B.) *C. menghiniana* and *Aphanizomenon* spp. (C.); and  
165 *Aphanizomenon* sp. and *Chlorella* spp. **D.** Spectral analysis of five algal cultures *Aphanizomenon*  
166 sp., *C. pyrenoidifera*, *D. divergens*, *C. menghiniana* and *Chlorella* sp. mixed together. **E.**  
167 Principal component analysis (PCA) performed for spectral data of algal cultures  
168 *Aphanizomenon* sp., *C. pyrenoidifera*, *D. divergens*, *C. menghiniana* and *Chlorella* sp. **i** –  
169 Projection of spectra of individual cells (left) of artificially mixed algal cultures onto the plane of  
170 the first two principal components (PC) (right). **ii** - Projection of spectra of individual cells (left)  
171 of a mixture of algal cultures onto the plane of the first two PCs (right). **iii** - Projection of spectra

172 of individual cells (left) of FCM gated populations from the mixture of algal cultures onto the  
173 plane of the PC1 and PC2 (top right) and the plane of the PC1 and PC3 (bottom right). **F.**  
174 Tracing different quantities of CCMP2764 *Aphanizomenon* sp. cells in an environmental sample  
175 from a pond based on the spectral characteristics. From left to right: 100% of 2764 cell culture,  
176 50% volume of 2764 culture and 50% volume of pond sample, 10% volume of 2764 culture and  
177 90% volume of pond sample, 5% volume of 2764 culture and 95% volume of pond sample, 1%  
178 volume of 2764 culture and 99% volume of pond sample, 0.5% volume of 2764 culture and  
179 95.5% volume of pond sample, and 100% of pond sample. The first row – all cells are displayed  
180 on channel 22 (405 nm laser excitation) versus channels V1-2 (405 nm laser excitation) density  
181 plot and a region corresponding to 2764 cells region are gated (L). Second row – spectra of gated  
182 L regions are displayed on 405 nm/638 nm spectrum plots. Third row – all cells in the sample are  
183 displayed on 405 nm/638 nm spectrum plots.

184

185 Spectra of gated in specific channels populations were then plotted to confirm the identity of  
186 discriminated populations. For spectral flow cytometry analysis of five algal mixtures *C.*  
187 *pyrenoidifera* and *C. menghiniana* populations were separated from the mixture based on CH12-  
188 14 and CH32 (488 nm excitation) filters (**Fig. 2D, step 1**). The rest of the mixture was gated and  
189 projected onto CH4-15 (405 nm excitation) versus CH32 (488 nm excitation) dot plot to  
190 discriminate the cell population of *Aphanizomenon* sp. (**Fig. 2D, step 2**). Consequently, the  
191 unidentified population was gated and visualized on combination of CH24-28 and CH30 (488  
192 nm excitation) filters to detach the last two populations of *D. divergens* and *Chlorella* sp. with  
193 very similar spectral profiles (**Fig. 2D, step 3**).

#### 194 **Spectrofluorometric analysis**

195 Spectrofluorometric data for microalgae cultures were obtained using a Varioscan Flash spectral  
196 scanning multimode reader (ThermoFisher Scientific, USA). The fluorometric scanning was  
197 performed in 515-800 nm wavelength range using 488 nm and 407 nm excitation modes. Prior to  
198 the analysis, all microalgae cultures were concentrated 30 times by centrifugation.

#### 199 **Statistical analysis**

200 Flow cytometry and spectral data were collected for at least 50,000 events for each sample and  
201 were plotted logarithmically and summarized in two-dimensional dot plots and spectrum plots.  
202 Spectral data from 500-800 nm wavelength range for 488 nm excitation (32 channel variables)  
203 and 420-800 nm wavelength range for 405 nm laser excitation (34 channel variables) were  
204 extracted from Sony software as FCS files and imported into FlowJo vs. 10.2 (Treestar, USA),  
205 where chlorophyll-positive algal populations were gated and the Area parameter of their spectra  
206 exported to comma separated values (CSV) text files. Some algal populations had a remarkably  
207 high number of cells with 0 values in channels 24-27 which may be associated with low  
208 chlorophyll signal due to dying of the cells. In order to reduce the cell heterogeneity within the  
209 sample, cells with no chlorophyll signal were removed from the population prior to the statistical  
210 analysis. The text files were then used to perform a principal component analysis (PCA) with 7  
211 principal components using statistical software UnscramblerX v10.4 (CAMO Software,  
212 Norway). Spectral differences were also analyzed using statistical software GraphPad (GraphPad  
213 Software, USA).

## 214 **Results and Discussion**

215 The SFC-VF method relies on identification the most variable regions of the spectra of the  
216 mixtures of algal strains analyzed pairwise, and on creating a matrix of SFC fluorescent channels  
217 corresponding to those regions. Spectral differences between single algal strains (morphology –  
218 **Fig. 1A<sub>left</sub>**) were captured by both spectral flow cytometer SONY SP6800 (SONY Biosciences,  
219 USA, 405 nm and 488 nm excitation) and spectrofluorometer (**Fig. 1A<sub>right</sub>, B**), however,  
220 spectrofluorometer provided an averaged signal from algal cells, debris and fluorescent organic  
221 matter. The separation of algal mixtures based on the conventional FCM approach and a filter  
222 combination used for algal analysis (such as phycoerythrin (PE) bandpass 575/25 nm) versus  
223 allophycocyanin (APC) bandpass (660/20 nm) was complicated by the heterogeneity of algal  
224 populations.

225 In SFC-VF approach, firstly, a sensitivity of chlorophyll-associated channels (CH24-30)  
226 captured on the SP6800 was switched to the minimal level. Then, the non-chlorophyll based  
227 spectral differences (from accessory pigments) in 420-650 nm wavelength range became  
228 prominent enabling better discrimination of algal strains (**Fig. 1C**). Further SFC analysis of algal  
229 cultures was continued with the reduced intensity of these channels.



230 Mixtures of algal cultures were analyzed in a pairwise manner generating ten different  
231 combinations. Initially, several variants of matrix of fluorescent channels corresponding to  
232 virtual filters capturing the algal spectra variability regions were created. We then selected a  
233 combination of fluorescent channels (virtual filter) that provides the best separation of two cell  
234 populations by dot plot. The spectra of the discriminated populations were further validated with  
235 the spectra of single algal culture controls (**Fig. 1B**). Furthermore, all five algal strains were  
236 mixed and analyzed using the spectral flow cytometry analyzer. To discriminate all algal taxa,  
237 we used a sequential gating and a combination of fluorescent channels based on virtual filters,  
238 previously selected for pairwise culture analysis (**Fig. 1C; 2A,B,C**). Consequently, the debris and  
239 fluorescent organic matter were excluded based on forward scatter/side scatter plot. Then, *C.*  
240 *pyrenoidifera* and *C. menghiniana* populations were separated from the other alga based on  
241 fluorescent channels CH12-14 and CH32 (488 nm excitation). The rest of the algal mixture was  
242 gated and projected onto CH4-15 (405 nm excitation) versus CH32 (488 nm excitation) dot-plot  
243 to discriminate the population of *Aphanizomenon* sp. Consequently, the initially unidentified  
244 population was gated and projected onto CH24-28 and CH30 (488 nm excitation) dot-plot to  
245 separate two populations of *D. divergens* and *Chlorella* sp. with very similar spectral profiles  
246 (**Fig. 2D**).

247 Spectral data recorded in 500-800 nm wavelength range for 488 nm laser excitation (32 channel  
248 variables) and 420-800 nm wavelength range for 405 nm laser excitation (34 channel variables)  
249 were used to perform a principal component analysis (PCA) of distribution of populations of  
250 algal cultures *Aphanizomenon* sp., *C. pyrenoidifera*, *D. divergens*, *C. menghiniana* and *Chlorella*  
251 sp. According to PCA results, better discrimination of algal populations was achieved using 405  
252 nm excitation spectral data (**Fig. 2A,B,C**). PCA scores plot showed statistically significant  
253 differences between mixed algal cultures with the first principal components capturing 78% of  
254 data variation (**Fig. 2Ei**). Moreover, it allows the separation of *C. pyrenoidifera* population into  
255 two subpopulations associated with the cell heterogeneity within the culture (**Fig. 2Ei**). When  
256 algal populations are projected onto the PC1 and PC3 plane, the two *C. pyrenoidifera*  
257 subpopulations are ceased, while no discrimination of sp., *D. divergens* and *Aphanizomenon* sp.  
258 populations is observed (**Fig. 2Eiii**). However, a poor differentiation of algal populations was  
259 observed when PCA was performed on spectral data of a physical mixture of all 5 strains (**Fig.**

260 **2Eii).** Also, t-SNE cluster analysis provided less clear discrimination of microalgae  
261 subpopulations (**Supporting Fig. 1**).

262 **Supporting Figure 1 Capture.** Application of t-SNE analysis to the spectral data of algal  
263 cultures *Chlorella* sp., *C. menhiniana*, *C. pyrenoidifera*, *Aphanizomenon* sp., and *D. divergens*.  
264 **A** – Color-coded file identifier columns representing FSC-H data for each strain in the merged  
265 file; **B** - t-SNE plot illustrating clusters of corresponding algal strains based on the spectral  
266 characteristics.

267

268 In the next approach we tested whether a particular microalgae type or species can be traced in  
269 the mixture of environmental microalgae populations based on its spectral profile. For this aim  
270 different quantities (from 50% to 0.5%) of *Aphanizomenon* sp. culture were mixed with  
271 environmental samples and analyzed using SFC-VF. Overall, it was possible to trace cell  
272 population of *Aphanizomenon* sp. in all eight environmental samples (an example of analysis is  
273 provided in **Fig. 2F**). A combination of the virtual filters CH 22 (405 nm excitation) and V1-2  
274 (405 nm excitation) enabled the best separation of *Aphanizomenon* sp. population in the 1:1  
275 mixture of *Aphanizomenon* sp. and environmental sample (50% strain 2764 : 50% pond) and was  
276 used for analysis of other volume ratios. Single control samples of *Aphanizomenon* sp. (100%  
277 strain 2764) were used to gate the region corresponding to fluorescent live cells and compare the  
278 spectra of the gated region in different ratio mixtures. Spectra of *Aphanizomenon* sp. cells could  
279 be traced in the mixture containing as little as 0.5% proportion relative to the total volume.  
280 Notably, a small population of cells with a spectral profile similar to *Aphanizomenon* sp. was  
281 detected in the gated region of 100% pure environmental sample, which can be explained by the  
282 presence of similar or same cyanobacteria species in the collected sample.

283 In conventional cytometry, hardware optical filters are used to separate fluorescent signals  
284 during instrument detection. To optimize fluorescence detection and decrease acquisition of  
285 signal coming from a region with high level of autofluorescence (for example, GFP signal from  
286 cellular autofluorescence in a green-range region), would require replacement of standard optical  
287 filter with modified one [23]. In SFC software, spectral unmixing algorithms can be applied for  
288 analysis of spectral data such as “conventional” algorithm based on Least Square Method (LSM),  
289 or Weighted Least Square Method (WLSM). We applied both spectral unmixing algorithms to

290 algal mixtures (data not shown). However, a spreading spillover from prominent **Chl *a*** led to  
291 insufficient resolution of different microalgae taxa. The SFC-VF approach [20, 24] allows the  
292 creation of “virtual bandpass filters” with no hardware modification and without spectral  
293 unmixing. As a result, it was possible to narrow or to widen spectral signal that is taken into  
294 consideration from ~10 nm to ~300 nm bandwidth (for SP6800 instrument) and to achieve  
295 significant discrimination of algal populations.

296 Here we analyzed representatives of 5 major groups of microalgae, namely (1) *Cyclotella*  
297 *menenginiana* from *Bacillariophyta* (diatoms); (2) *Cryptomonas pyrenoidifera* from *Cryptophyta*  
298 (cryptophytes); (3) *Aphanizomenon sp.* from *Cyanobacteria*; (4) *Chlorella sp.* from *Chlorophyta*  
299 (green algae); (5) *Dinobryon divergens* from *Ochrophyta* (chrysophytes) as model microalgal  
300 species. The data presented demonstrate the potential of our approach to the identification and  
301 quantitative evaluation of algal mixtures and experimental samples. In our study we used fresh  
302 cultures, however, there are anticipated that different preservation protocols (fixation in  
303 paraformaldehyde and freezing in liquid nitrogen) may have a smoothing effect on shape of  
304 emission spectra like it happens for absorption spectral region where absorption related to  
305 phycobilins [25]. One of main constraints in applying optical methods to phytoplankton species  
306 detection is lack of scattering data and the limited knowledge of intra-species variation in  
307 spectral emission under natural condition [25]. Previous attempts to use phytoplankton  
308 fluorescence for taxa classification were considered unsuccessful [26]. Simultaneous utilization  
309 of light scattering and excitation-emission spectral matrix results in SFC provides more accurate  
310 and consistent information that could be used for identification of major algal taxa. To quantitate  
311 abundancy of algal populations calibration beads can be used, since light scattering measurement  
312 in SFC allows for absolute counting of algal populations based on a ratio between algae and  
313 beads.

314 The developed novel SFC-VF approach utilizes a combination of spectral virtual filtering  
315 matrixes and light scattering and demonstrates the potential of SFC capability to distinguish  
316 fluorescence from highly overlapping autofluorescent pigments and discriminate major algal taxa  
317 (such as cryptophytes, presented in small numbers in environmental samples). The SFC-VF  
318 approach for algal taxa differentiation opens up new research areas and possibilities of algal  
319 blooms monitoring in aquatic communities.

## 320 **Acknowledgements**

321 Authors are grateful for grant support from Ministry of Sciences, Kazakhstan to I.A.V. and  
322 N.S.B. We also thankful to Jeff Clapper and Steve Conway of Sony Biotechnology Inc., John  
323 Daley and Andrew Mason of Dana-Farber Cancer Center Flow Cytometry Core, Boston, USA  
324 for invaluable help and access to instrumentation, and to Nicole Poulton, Bigelow Laboratory of  
325 Ocean Sciences, USA for helpful advice.

326

## 327 **References**

- 328 1. Poryvkina L, Babichenko S, Kaitala S, Kuosa H, A. Shalapjonok A. Spectral fluorescent  
329 signatures in the characterization of phytoplankton community composition. *J. Plankton*  
330 *Res.* 1994; 16: 1315–1327.
- 331 2. Jeffrey SW, Mantoura RFC, Wright SW (Eds.). *Phytoplankton pigments in*  
332 *oceanography: guidelines to modern methods*, UNESCO Publishing; 1997.
- 333 3. Culverhouse PF, Williams R, Reguera B, Herry V, González-Gil S. Do experts make  
334 mistakes? A comparison of human and machine identification of dinoflagellates, *Mar.*  
335 *Ecol. Prog. Ser.* 2003; 247: 17–25.
- 336 4. Yentsch CS, Yentsch CM. Fluorescence spectral signatures: the characterization of  
337 phytoplankton populations by use of excitation and emission spectra. *J. Marine Res.*  
338 1979; 37: 471-483.
- 339 5. Poryvkina L, Babichenko S, Leeben A, Analysis of phytoplankton pigments by excitation  
340 spectra of fluorescence. *Proceedings EARSeL-SIG-Workshop LIDAR, Dresden/FRG;*  
341 2000.
- 342 6. Babichenko S, Kaitala S, Leeben A, Poryvkina L, Seppala J. Phytoplankton pigments and  
343 dissolved organic matter distribution in the Gulf of Riga. *J. Mar. Systems.* 1999; 23: 69–  
344 82.
- 345 7. Kolbowski J, Schreiber U. Computer-controlled phytoplankton analyzer based on 4-  
346 wavelengths PAM chlorophyll fluorometer. *Photosynthesis: from light to biosphere.*  
347 1995; 5: 825-828.

- 348 8. Beutler M, Wiltshire KH, Meyer B, Moldaenke C, Luering C, Meyerhoefer M, Hansen  
349 U-P, Dau H. A fluorometric method for the differentiation of algal populations *in vivo*  
350 and *in situ*, *Photosynthesis Res.* 2002; 72: 39-53.
- 351 9. Jesus B, Rosa P, Mouget J-L, Meleder V, Launeau P, Barille L. Spectral-radiometric  
352 analysis of taxonomically mixed microphytobenthic biofilms. *Remote Sense Environ.*  
353 2014; 140: 196-205.
- 354 10. Houliez E, Lizon F, Thyssen M, Artigas LF, Schmitt FG. Spectral fluorometric  
355 characterization of haptophyte dynamics using the Fluoroprobe: an application in the  
356 eastern English Channel for monitoring *Phaeocystis globosa*. *J. Plankton Res.* 2012; 34:  
357 136-151.
- 358 11. Rowan KS. *Photosynthetic Pigments of Algae*. Cambridge University Press, Cambridge,  
359 1989.
- 360 12. Oldham PB, E.J. Zillioux EJ, I.M. Warner IM. Spectral “fingerprinting” of phytoplankton  
361 populations by two-dimensional fluorescence and Fourier-transform-based pattern  
362 recognition, *J. Marine Res.* 1985; 43: 893–906.
- 363 13. Zhang QQ, Lei SH, Wang XL, Zhua CJ. Discrimination of phytoplankton classes using  
364 characteristic spectra of 3D fluorescence spectra. *Spectrochimica Acta Part A* 2006; 63:  
365 361–369.
- 366 14. Sathyendranath S, Lazzara L, Prieur L. Variations in the spectral values of specific  
367 absorption spectra, *Limnol. Oceanogr.* 1987; 34:1512-1525.
- 368 15. Proctor CW, Roesler CS. New insights on obtaining phytoplankton concentration and  
369 composition from in situ multispectral chlorophyll fluorescence. *Limnol. Oceanogr.*  
370 *Methods* 2010; 8: 695-708.
- 371 16. Goldman EA, Smith EM, Richardson TL. Estimation of chromophoric dissolved organic  
372 matter (CDOM) and photosynthetic activity of estuarine phytoplankton using a multiple-  
373 fixed-wavelength spectral fluorimeter. *Water Res.* 2013; 47:1616-1630.
- 374 17. Gregori G, Patsekina V, Rajwa B, Jones J, Ragheb K, Holdman C, Robinson JP. Hyper-  
375 spectral cytometry at the single-cell level using a 32-channel photodetector. *Cytometry A*  
376 2012; 81: 35-44.
- 377 18. Sanders CK, Mourant JR. Advantages of full spectrum flow cytometry. *J. Biomed. Optics*  
378 2013; 18: 037004.

- 379 19. Nolan JP, Condello D, Duggan E, Naivar M, Novo D. Visible and near infrared  
380 fluorescence spectral flow cytometry. *Cytometry A* 2013; 83: 253-264.
- 381 20. Dashkova V, Clapper J, Vorobjev IA, Barteneva NS. Spectral and imaging flow  
382 cytometry in phytoplankton research. *Methods Mol. Biol.* 2018; 1745: 83-95.
- 383 21. Lehman JT. Ecological and nutritional studies on *Dinobryon Ehrenb.*: Seasonal  
384 periodicity and the phosphate toxicity problem. *Limnol. Oceanogr.* 1976; 21: 646-658.
- 385 22. Futamura K, Sekino M, Hata A, Ikebuchi R, Nakanishi Y, Egawa G et al. Novel full-  
386 spectral flow cytometry with multiple spectrally adjacent fluorescent proteins and  
387 fluorochromes and visualization of in vivo cellular movement. *Cytometry A* 2015; 87:  
388 830-842.
- 389 23. Vorobjev IA, Buchholz K, Prabhat P, Ketman K, Egan ES, Marti M, Duraisingh MT,  
390 Barteneva NS, Optimization of flow cytometric detection and cell sorting of transgenic  
391 *Plasmodium* parasites using interchangeable optical filters. *Malaria J.* 2012; 11: 312. doi:  
392 10.1186/1475-2875-11-312.
- 393 24. Dashkova V, Segev E, Malashenkov D, Kolter R, Vorobjev I, Barteneva NS. Microalgal  
394 cytometric analysis in the presence of endogenous autofluorescent pigments. *Algal Res.*  
395 2016; 19: 370-380. <http://dx.doi.org/10.1016/j.algal.2016.05.013>.
- 396 25. Wojtasiewicz B, Ston-Egiert J. Bio-optical characterization of selected cyanobacteria  
397 strains present in marine and freshwater ecosystems. *J. Appl. Phycol.* 2016; 28: 2299-  
398 2314.
- 399 26. MacIntyre HL, Lawrenz E, Richardson TL. Taxonomic discrimination of phytoplankton  
400 by spectral fluorescence, In: Suggett DJ, Prashil O, Borowitzka MA (Eds.) *Chlorophyll a*  
401 *fluorescence in aquatic sciences: methods and applications*, Springer, Netherlands, pp  
402 129-169, 2010.

403

404

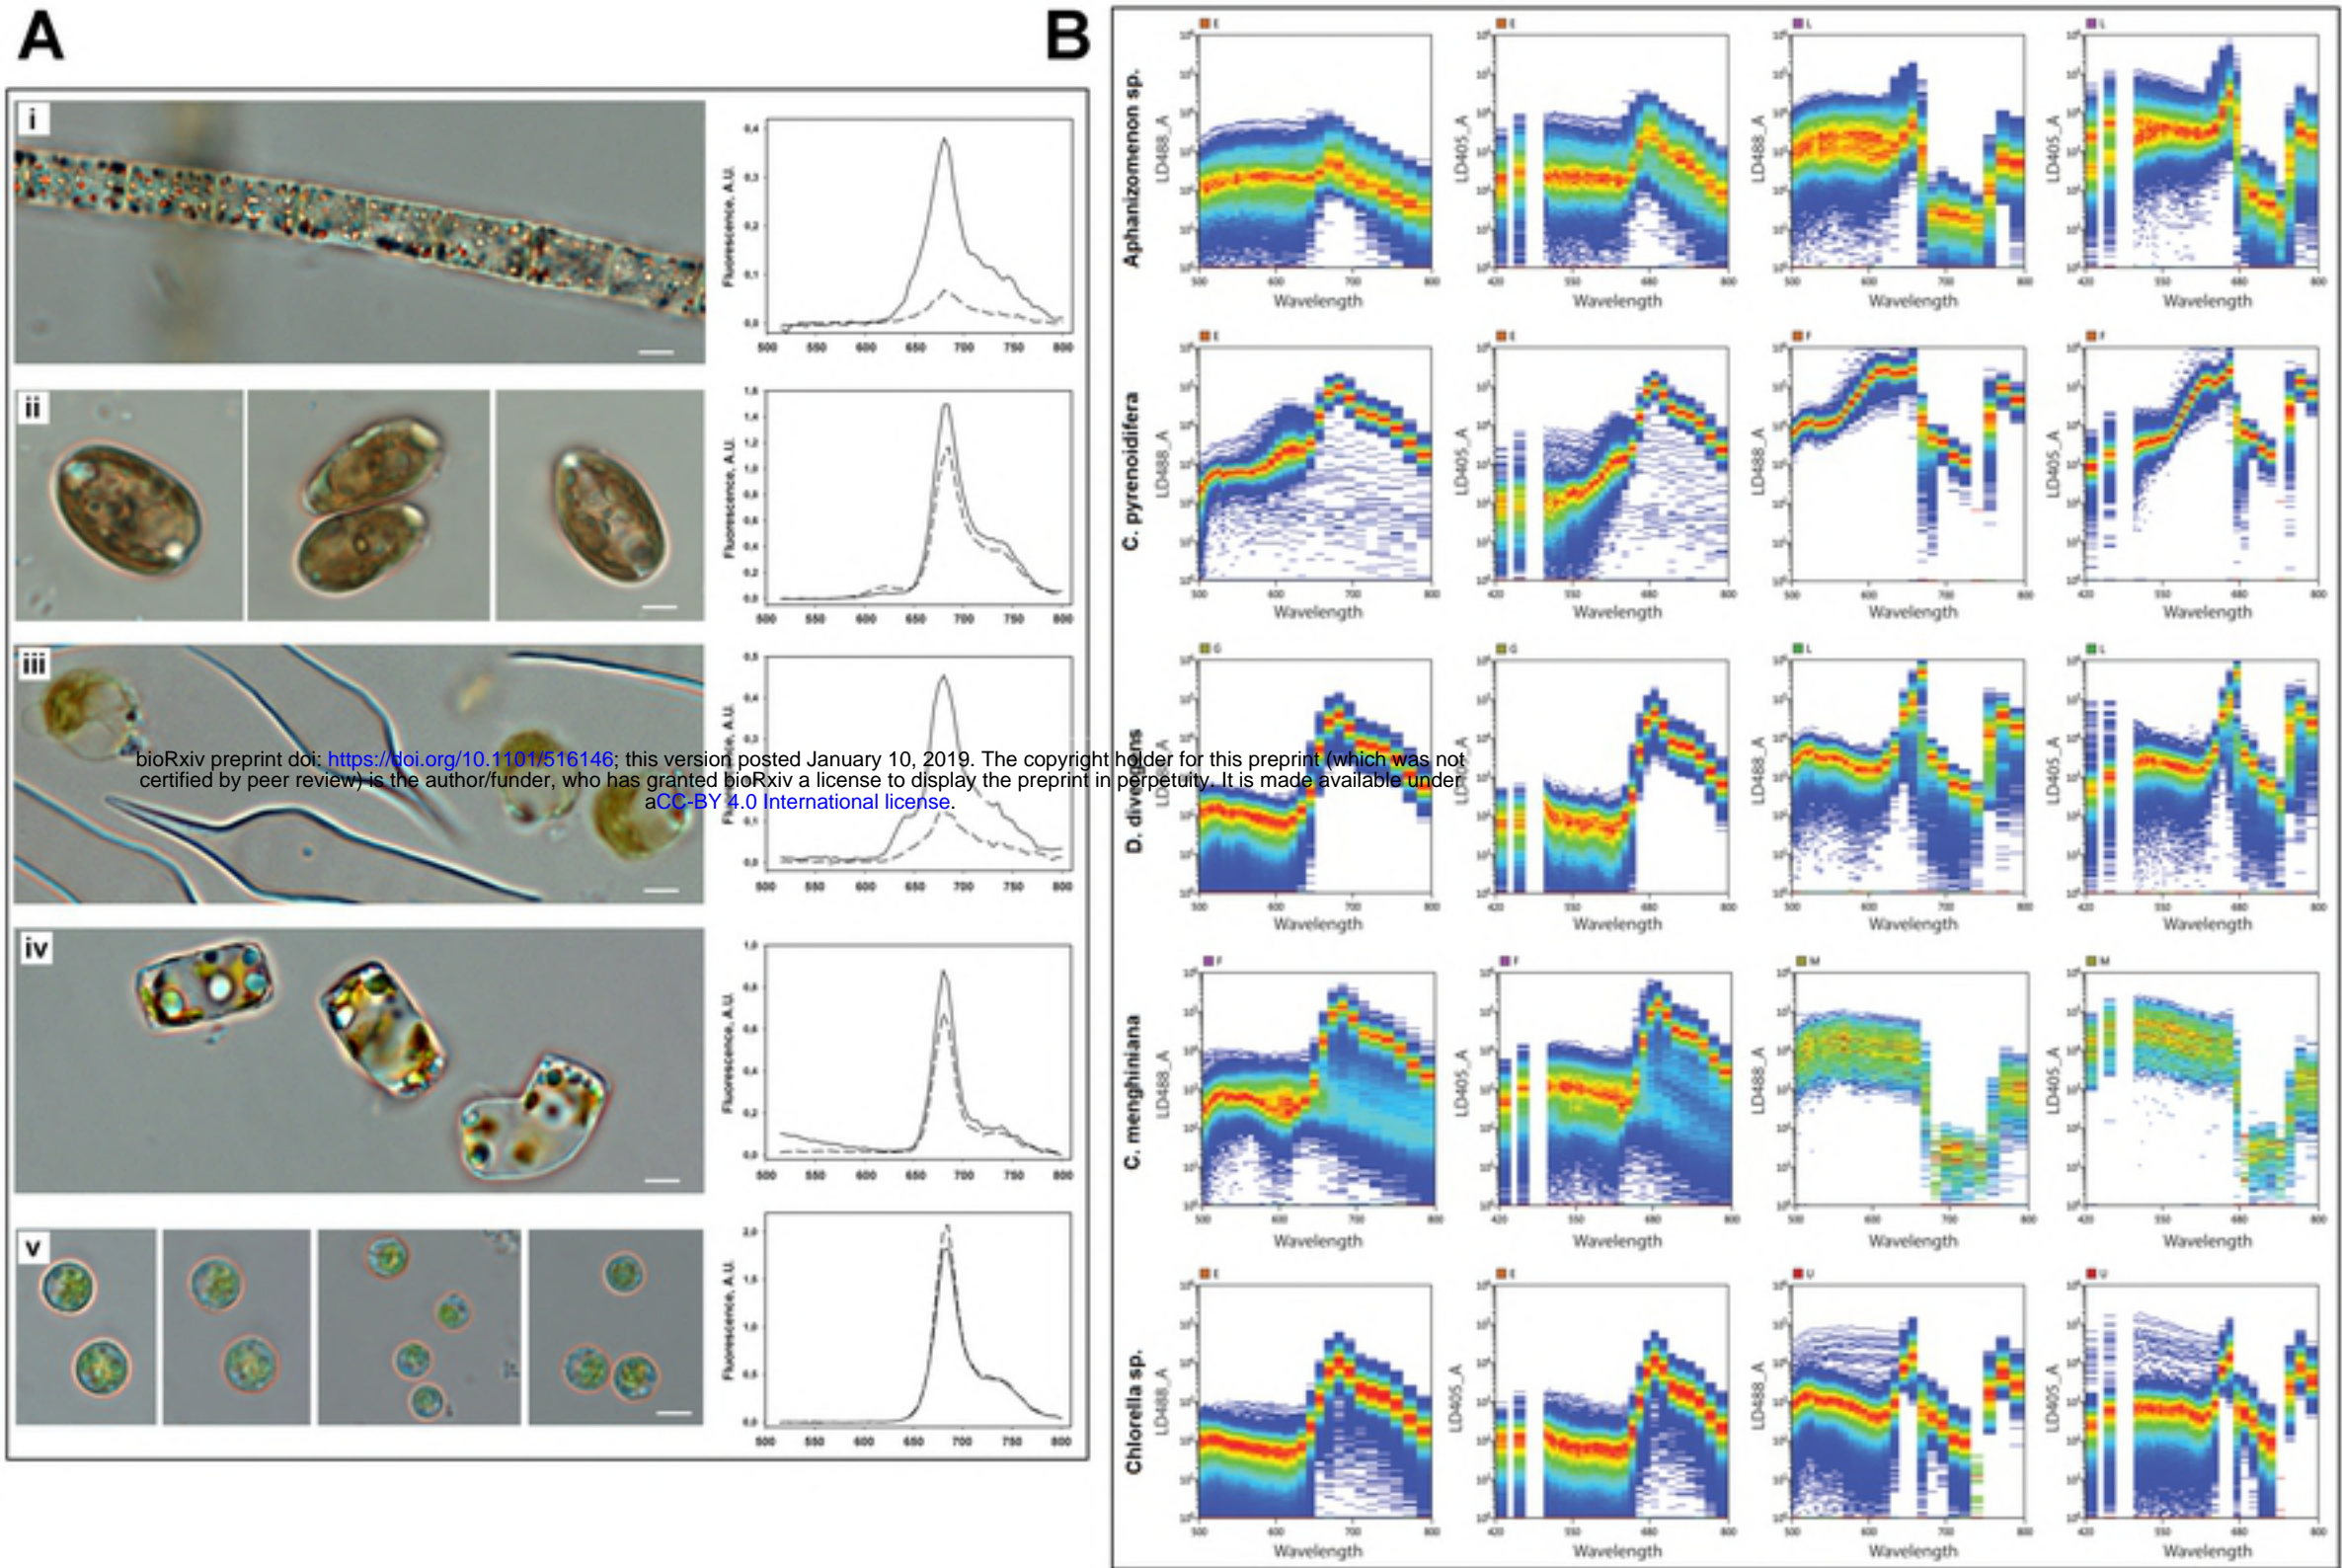

Figure

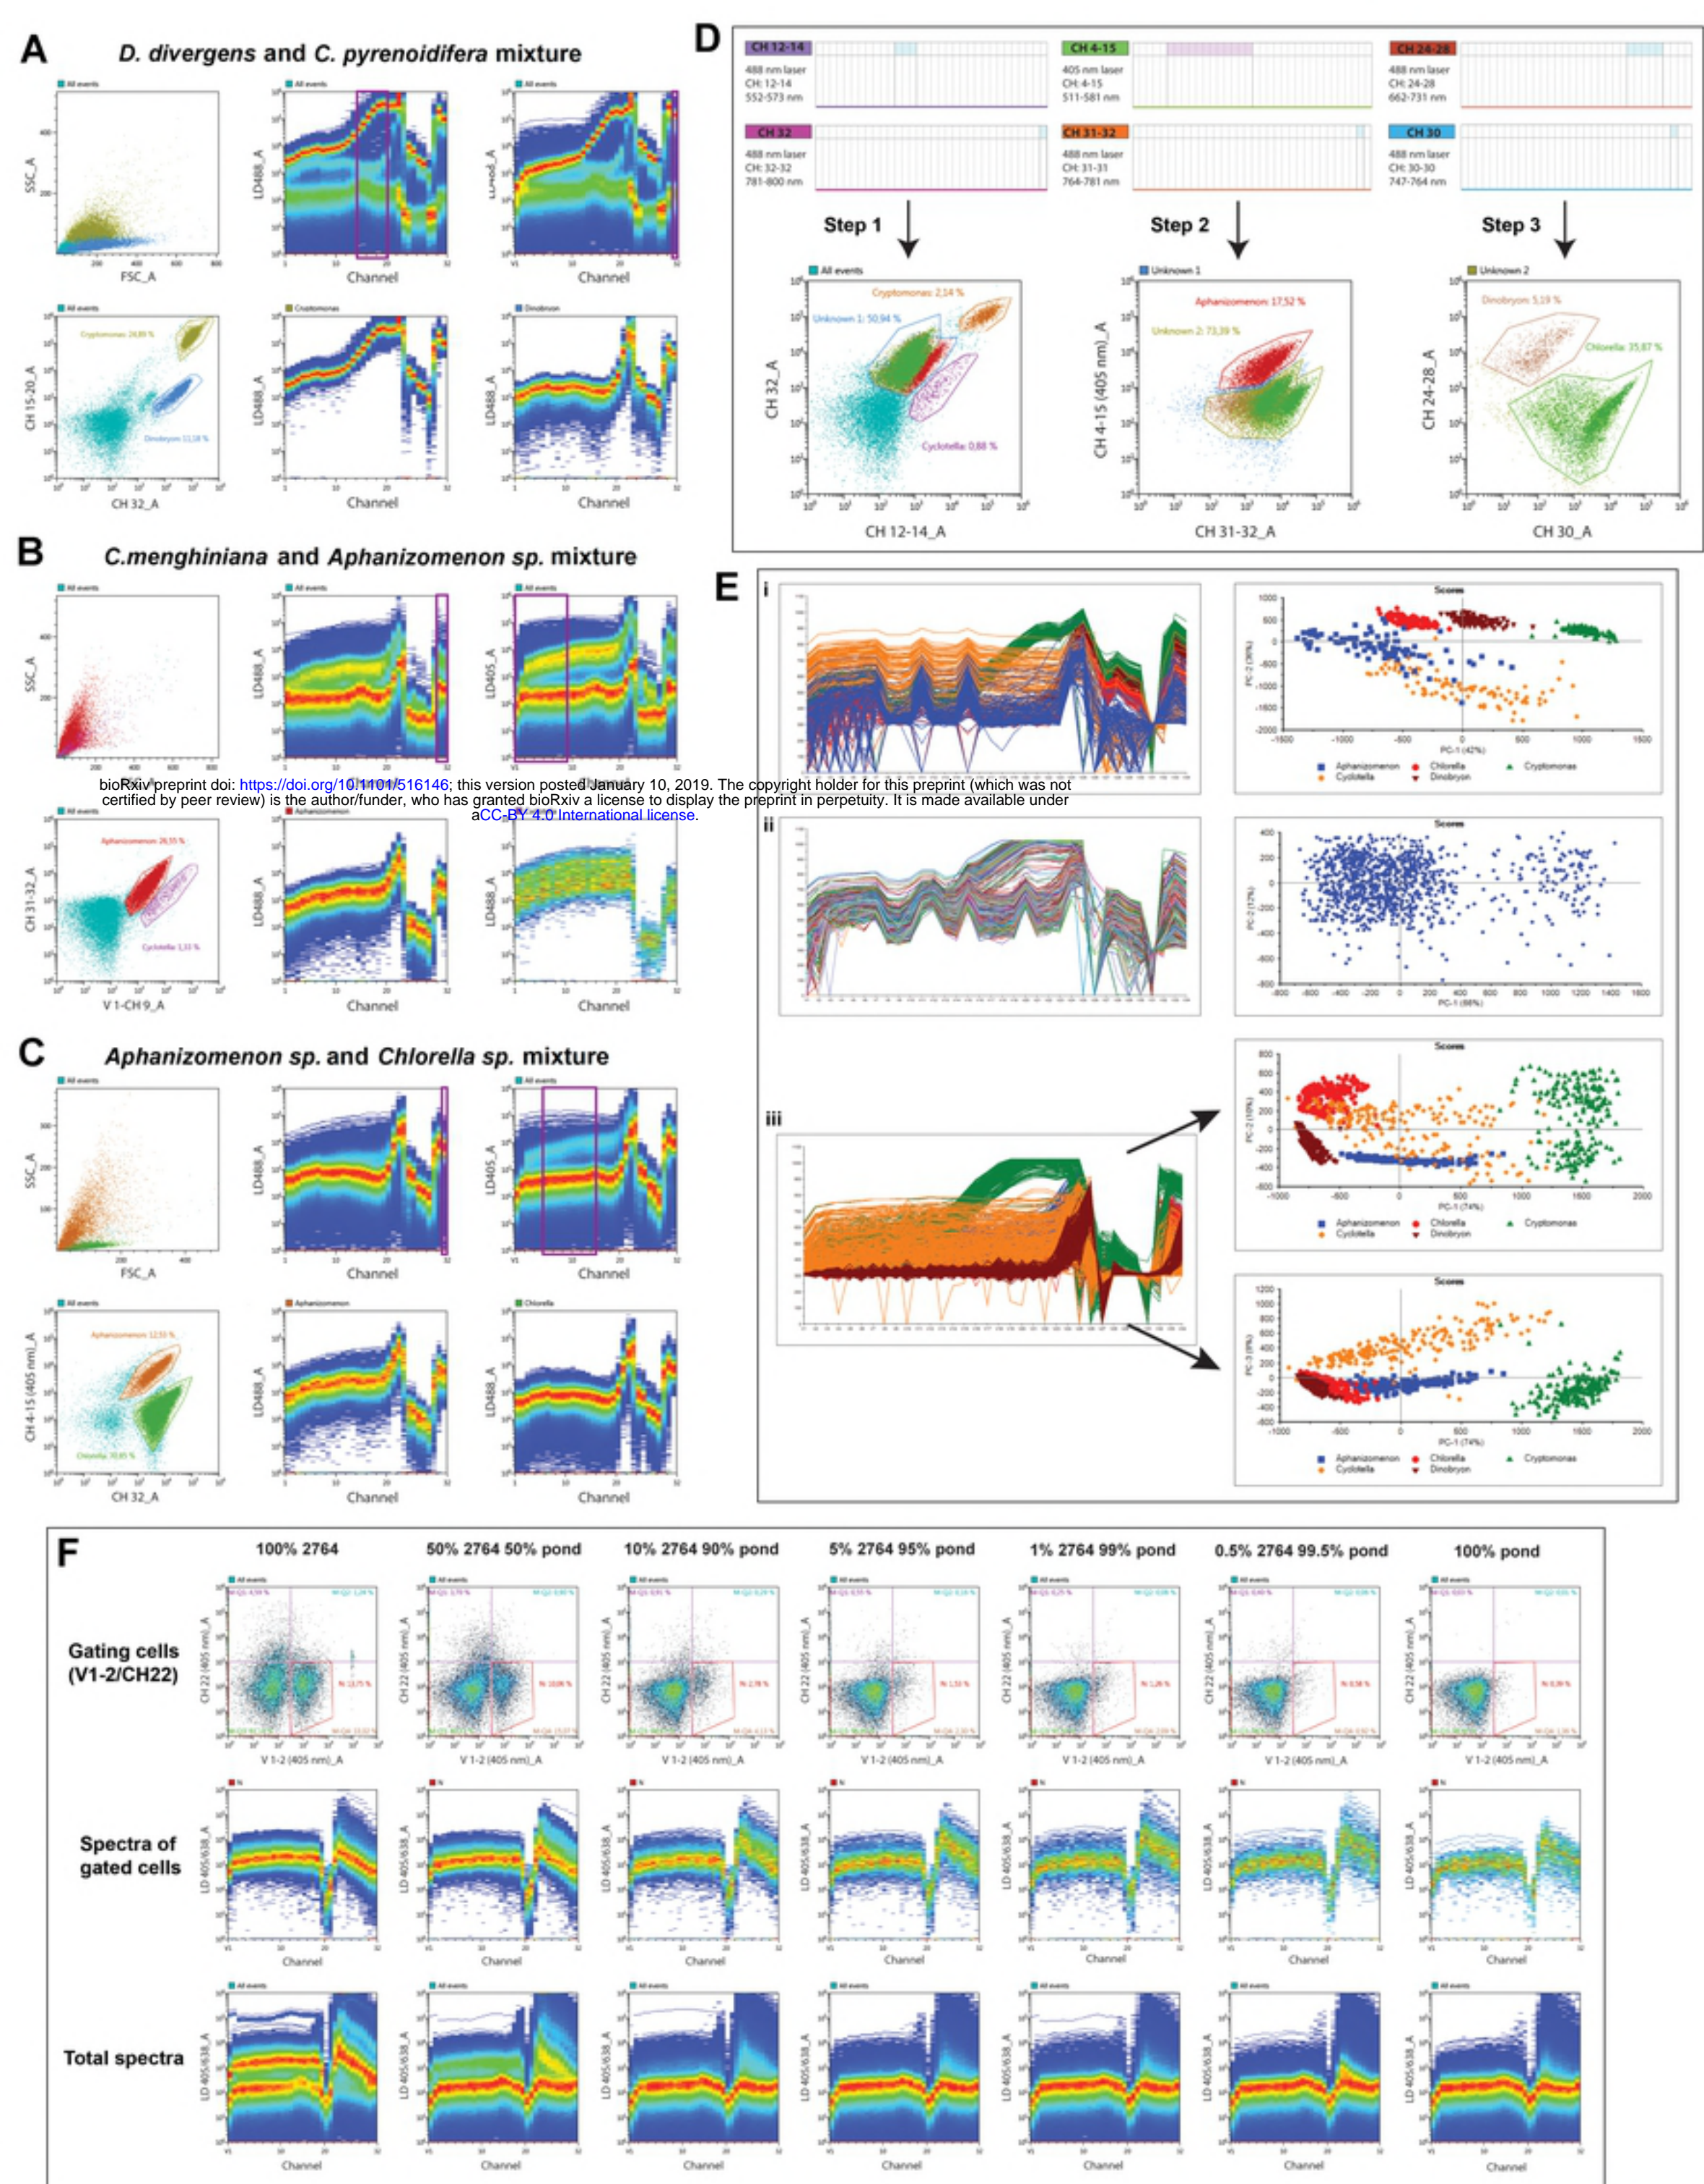

bioRxiv preprint doi: <https://doi.org/10.1101/516146>; this version posted January 10, 2019. The copyright holder for this preprint (which was not certified by peer review) is the author/funder, who has granted bioRxiv a license to display the preprint in perpetuity. It is made available under aCC-BY 4.0 International license.
